# Supplementary material
Source: MDPI journal article supplement (https://www.mdpi.com/2624-8549/5/1/12)
Supplement: s1 [file s1 › chemistry-2125049-supplementary.pdf]

## SUPPLEMENTARY MATERIALS

**A new unnatural amino acid derived from the modification of 4'-(p-tolyl)-2,2':6',2''-terpyridine and its mixed ligand complexes with ruthenium: synthesis, characterization, and photophysical properties.**

Konstantinos Ypsilantis<sup>a</sup>, Antonia Garypidou<sup>a</sup>, Andreas Gikas<sup>a</sup>, Alexandros Kiapekos<sup>a</sup>, Jhon C. Plakatouras and Achilleas Garoufis<sup>a,b\*</sup>

<sup>a</sup> Department of Chemistry, University of Ioannina, GR-45110 Ioannina, Greece.

<sup>b</sup> University Research Centre of Ioannina (URCI), Institute of Materials Science and Computing, Ioannina, Greece.

### TABLE OF CONTENTS

**FIGURE S1:** <sup>1</sup>H NMR spectrum of (**4**) with proton assignments in dmso-d<sub>6</sub> at 298K.

**FIGURE S2:** <sup>1</sup>H NMR spectrum of (**5**) with proton assignments in dmso-d<sub>6</sub> at 298K.

**FIGURE S3:** <sup>1</sup>H NMR spectrum of (**6**) with proton assignments in dmso-d<sub>6</sub> at 298K.

**FIGURE S4:** <sup>1</sup>H NMR spectrum of (**7**) with proton assignments in dmso-d<sub>6</sub> at 298K.

**FIGURE S5:** <sup>1</sup>H NMR spectrum of (**8**) with proton assignments in dmso-d<sub>6</sub> at 298K.

**FIGURE S6:** <sup>1</sup>H NMR spectrum of (**9**) with proton assignments in dmso-d<sub>6</sub> at 298K.

**FIGURE S7:** <sup>1</sup>H NMR spectrum of (**10**) with proton assignments in dmso-d<sub>6</sub> at 298K.

**FIGURE S8:** <sup>1</sup>H NMR spectrum of (**11**) with proton assignments in dmso-d<sub>6</sub> at 298K.

**FIGURE S9:** High-resolution ESI MS spectrum of (**4**).

**FIGURE S10:** High-resolution ESI MS spectrum of (**5**). Inset the calculated and the experimental (A) and the calculated (B) isotopic patterns of the cation.

**FIGURE S11:** High-resolution ESI MS spectrum of (**6**).

**FIGURE S12:** High-resolution ESI MS spectrum of (**7**). Inset the calculated and the experimental (A) and the calculated (B) isotopic patterns of the cation.

**FIGURE S13:** High-resolution ESI MS spectrum of (**8**). Inset the calculated and the experimental (A) and the calculated (B) isotopic patterns of the cation.

**FIGURE S14:** High-resolution ESI MS spectrum of (**9**). Inset the calculated and the experimental (A) and the calculated (B) isotopic patterns of the cation.

**FIGURE S15:** High-resolution ESI MS spectrum of (**10**).

**FIGURE S16:** High-resolution ESI MS spectrum of (**11**).

**FIGURE S17.** Normalized UV spectra of (**1**) and (**2**) in acetonitrile.

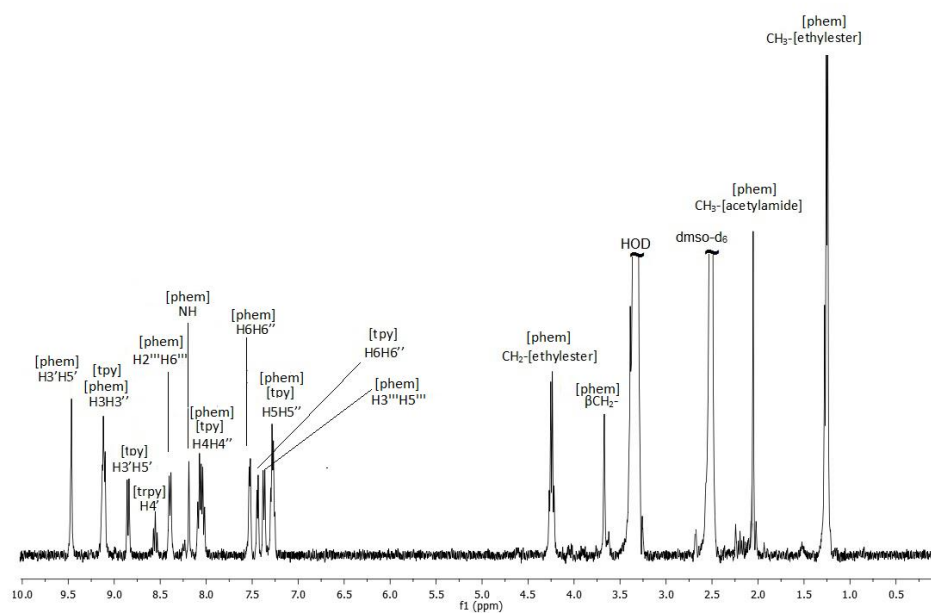

**FIGURE S1:**  $^1\text{H}$  NMR spectrum of (**4**) with proton assignments in  $\text{dms0-d}_6$  at 298K.

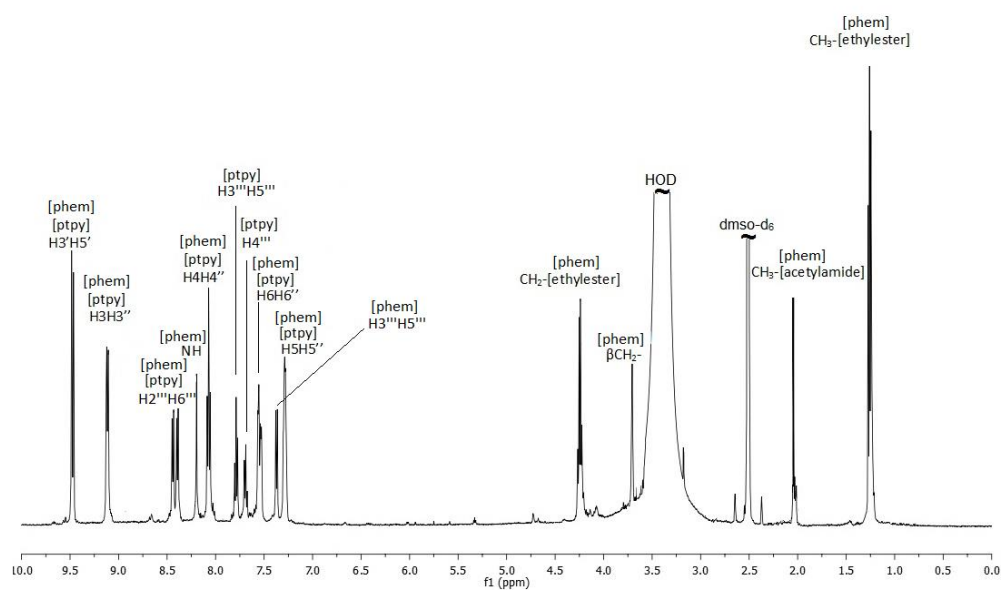

**FIGURE S2:**  $^1\text{H}$  NMR spectrum of (**5**) with proton assignments in  $\text{dms0-d}_6$  at 298K.

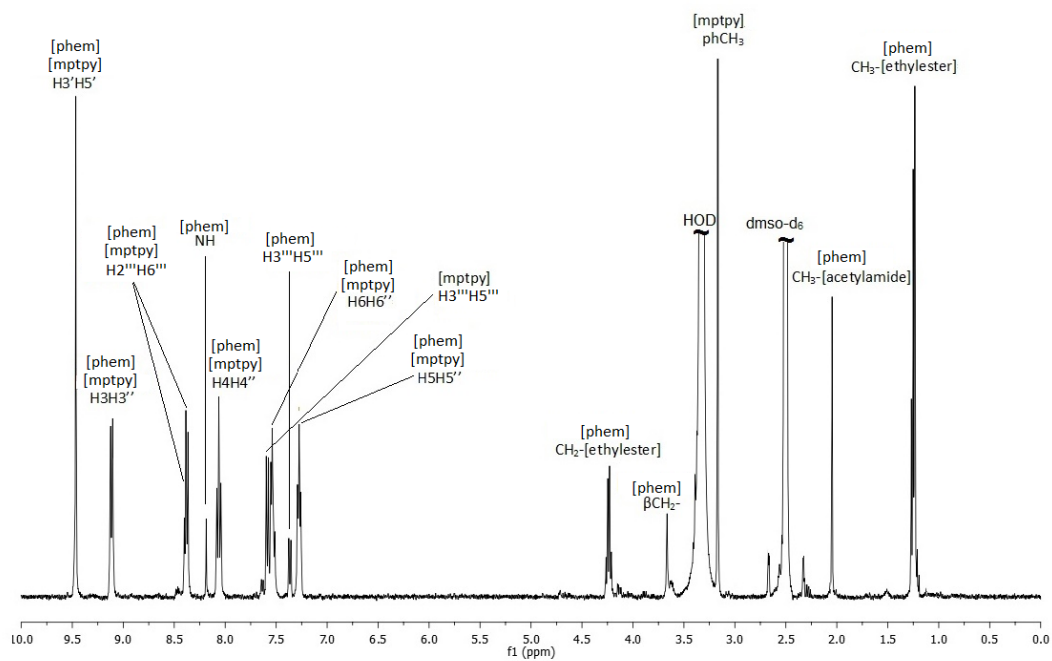

**FIGURE S3:**  $^1\text{H}$  NMR spectrum of (6) with proton assignments in  $\text{dms0-d}_6$  at 298K.

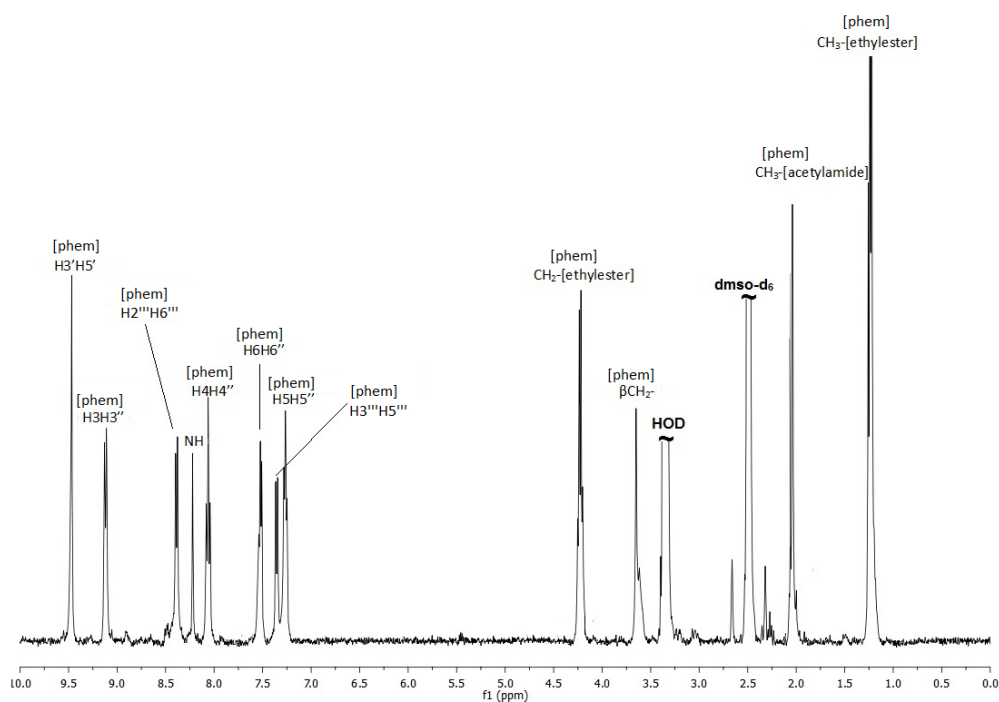

**FIGURE S4:**  $^1\text{H}$  NMR spectrum of (7) with proton assignments in  $\text{dms0-d}_6$  at 298K.

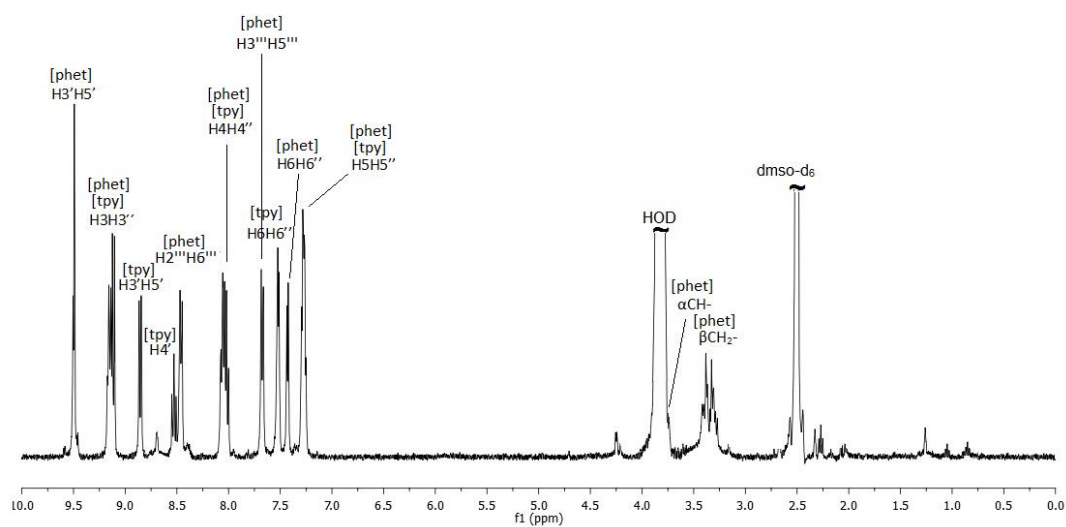

**FIGURE S5:** <sup>1</sup>H NMR spectrum of (8) with proton assignments in dms0-d<sub>6</sub> at 298K.

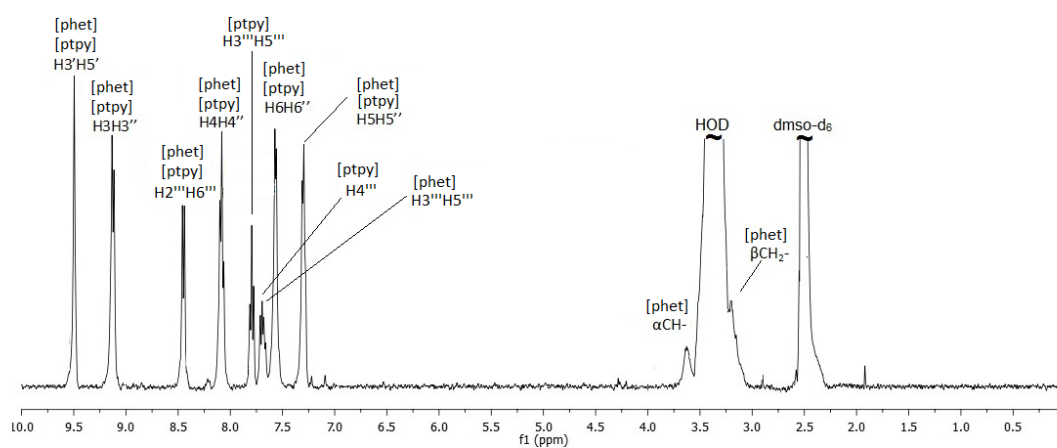

**FIGURE S6:** <sup>1</sup>H NMR spectrum of (9) with proton assignments in dms0-d<sub>6</sub> at 298K.

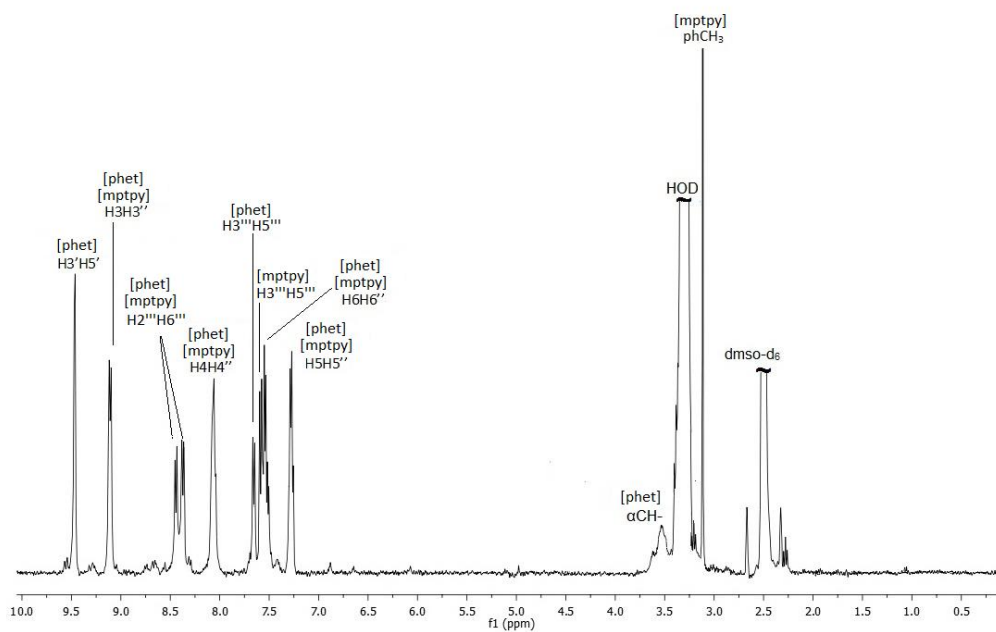

**FIGURE S7:**  $^1\text{H}$  NMR spectrum of (**10**) with proton assignments in  $\text{dms0-d}_6$  at 298K.

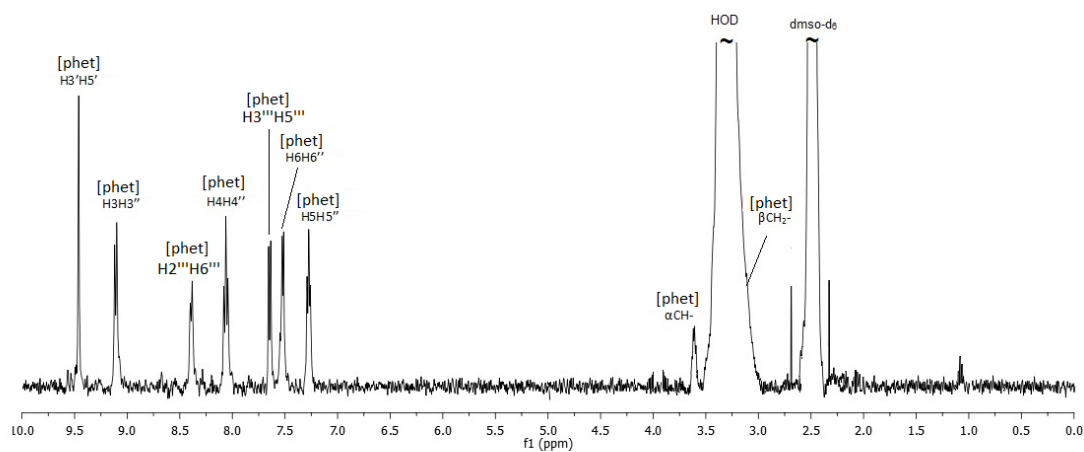

**FIGURE S8:**  $^1\text{H}$  NMR spectrum of (**11**) with proton assignments in  $\text{dms0-d}_6$  at 298K.

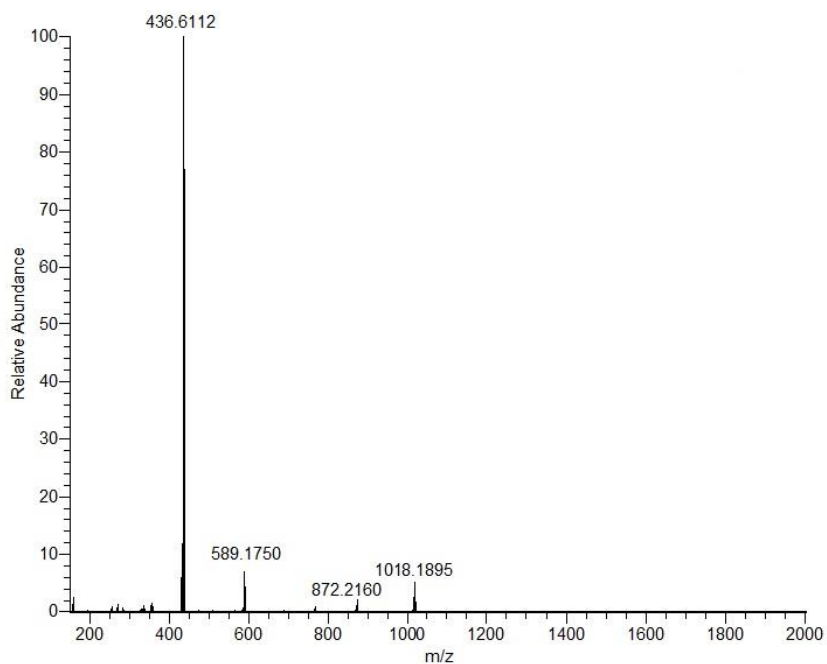

**FIGURE S9:** High-resolution ESI MS spectrum of (4).

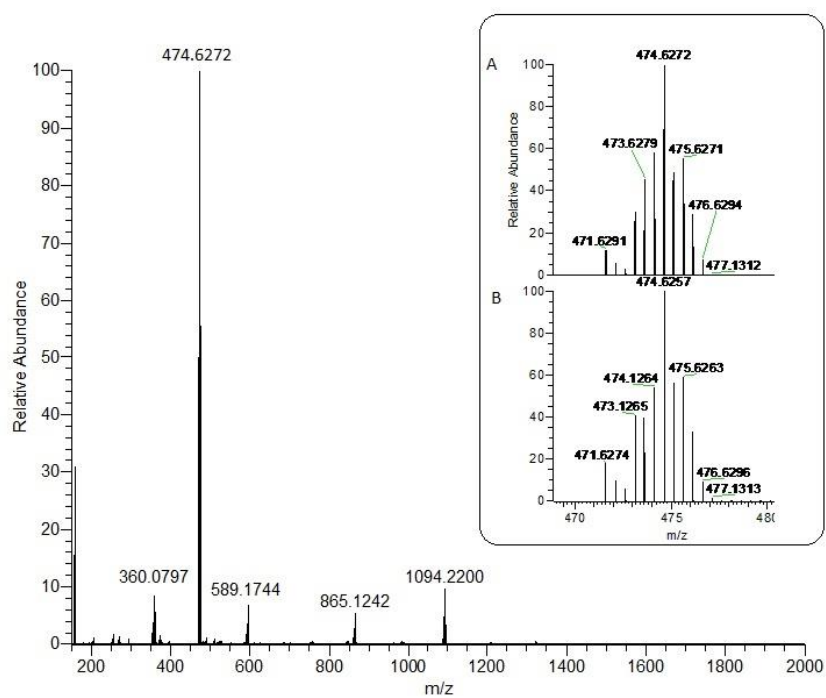

**FIGURE S10:** High-resolution ESI MS spectrum of (5). Inset the calculated and the experimental (A) and the calculated (B) isotopic patterns of the cation.

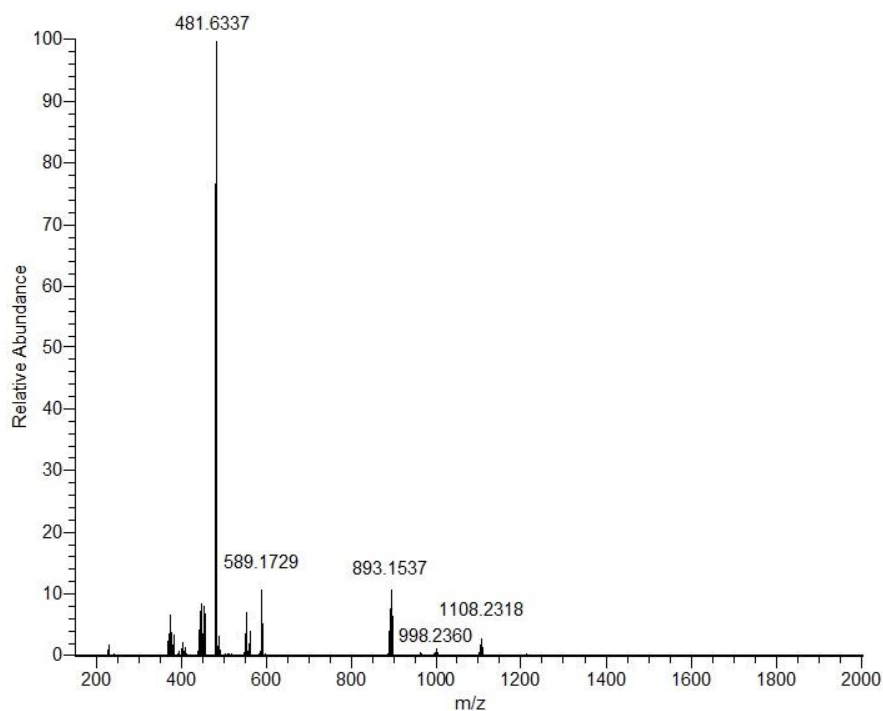

**FIGURE S11:** High-resolution ESI MS spectrum of (6).

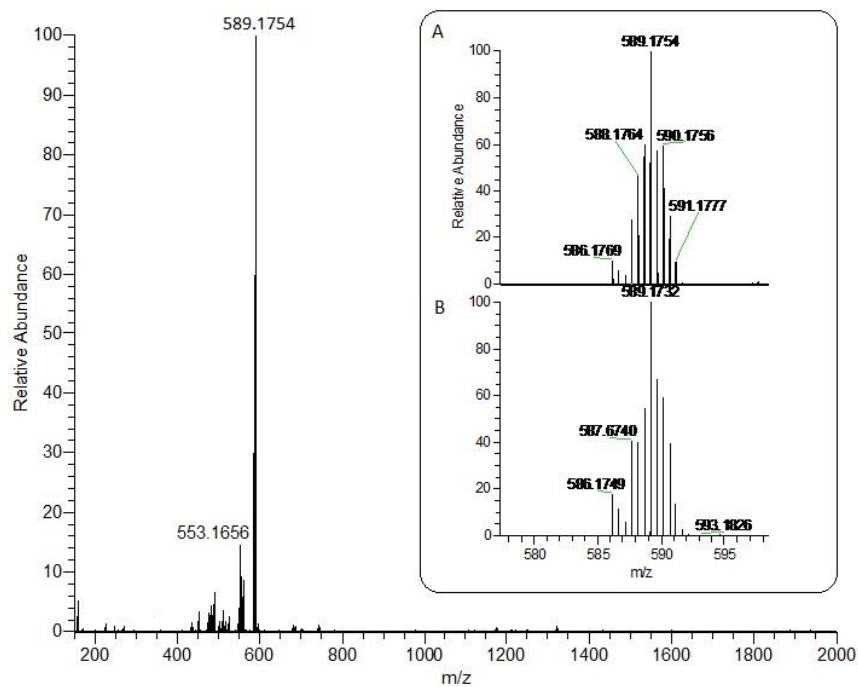

**FIGURE S12:** High-resolution ESI MS spectrum of (7). Inset the calculated and the experimental (A) and the calculated (B) isotopic patterns of the cation.

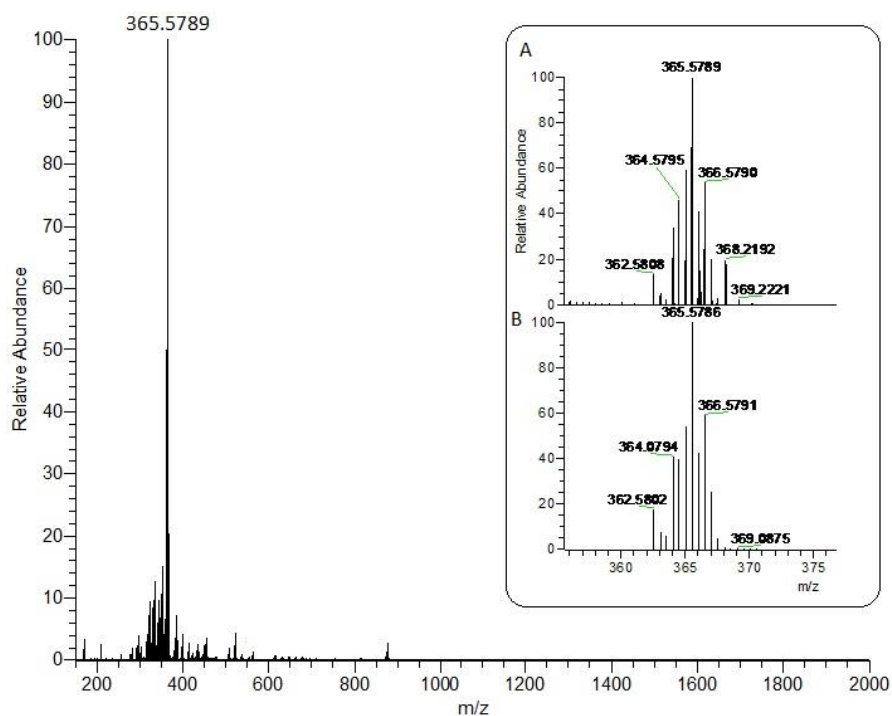

**FIGURE S13:** High-resolution ESI MS spectrum of (**8**). Inset the calculated and the experimental (A) and the calculated (B) isotopic patterns of the cation.

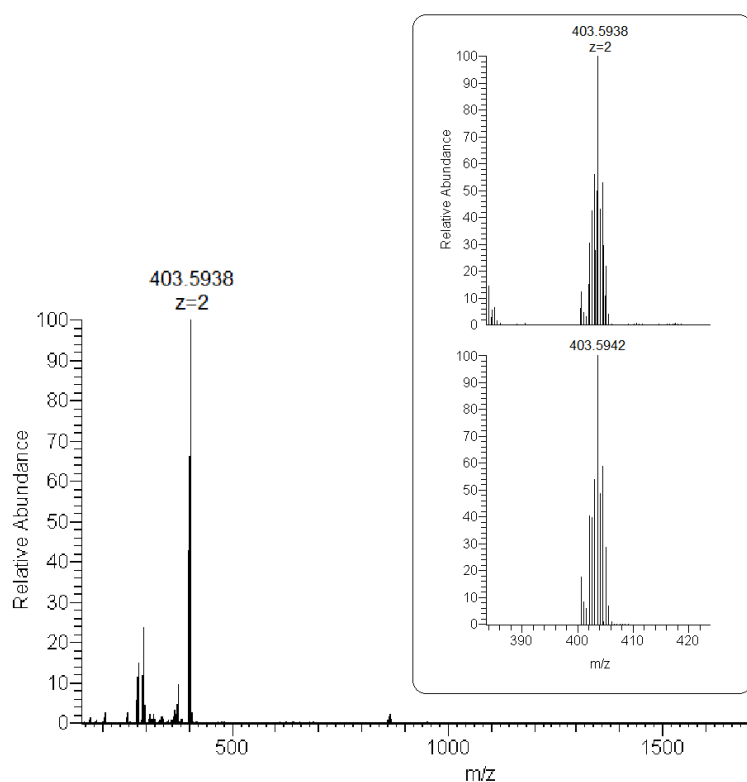

**FIGURE S14:** High-resolution ESI MS spectrum of (**9**). Inset the calculated and the experimental (A) and the calculated (B) isotopic patterns of the cation.

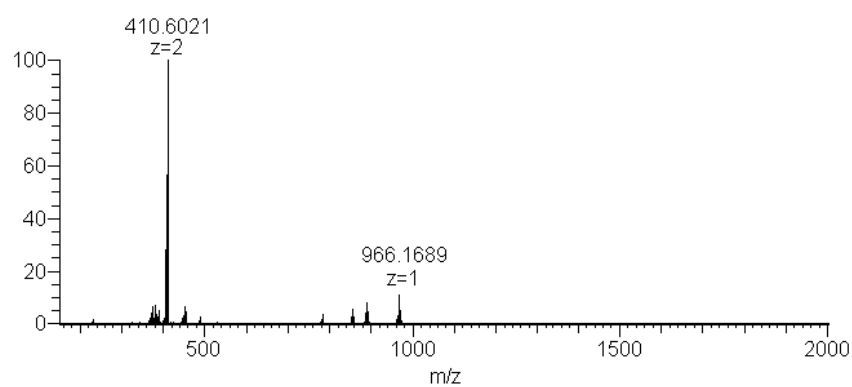

**FIGURE S15:** High-resolution ESI MS spectrum of (10).

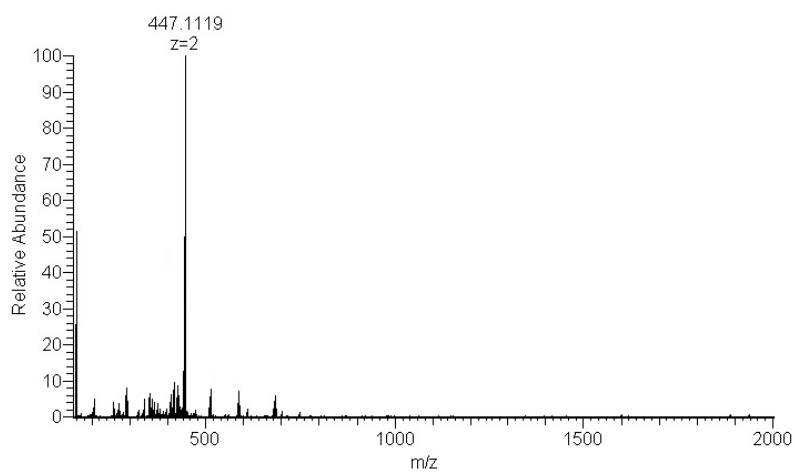

**FIGURE S16:** High-resolution ESI MS spectrum of (11).

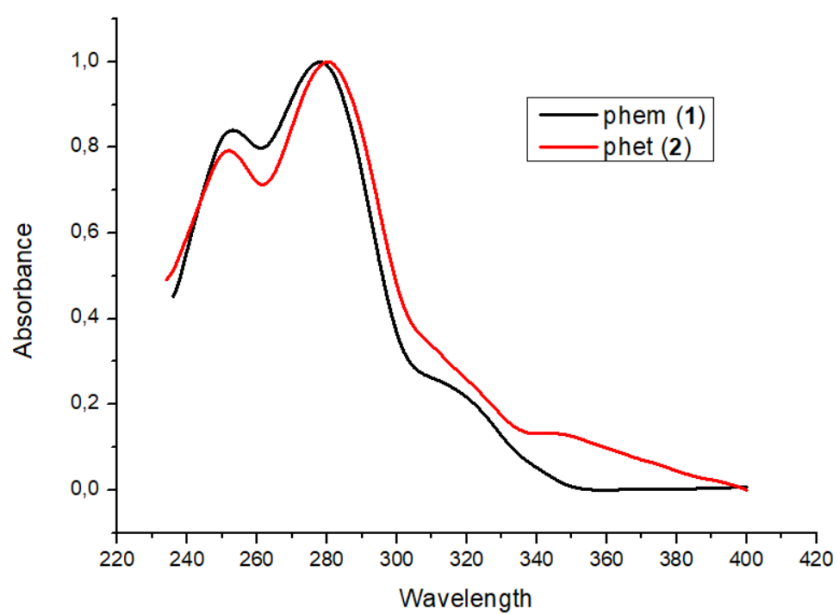

**FIGURE S17.** Normalized UV spectra of **(1)** and **(2)** in acetonitrile.
